# Supplementary material for: Combatting Planktonic and Biofilm Populations of Carbapenem-Resistant Acinetobacter baumannii with Polymyxin-Based Combinations
Source: MDPI journal article supplement (doi:10.3390/antibiotics11070959), 2022-07-16
Supplement: s1 [file s1]

**TABLE S1.** *A. baumannii* mean bacterial density ( $\log_{10}$  CFU/mL  $\pm$  SD) after 2, 6, and 24 h exposure to antibiotics in time-kill assays for both biofilm and planktonic population.

| BIOFILM POPULATION <sup>a</sup> |               |                                                   |             |             | PLANKTONIC POPULATION <sup>b</sup> |             |             |
|---------------------------------|---------------|---------------------------------------------------|-------------|-------------|------------------------------------|-------------|-------------|
| Isolate                         | Antibiotic    | Bacterial Density (log <sub>10</sub> CFU/mL) ± SD |             |             |                                    |             |             |
|                                 |               | 2 h                                               | 6 h         | 24 h        | 2 h                                | 6 h         | 24 h        |
| AR-276                          | PMB           | 6.97 ± 0.29                                       | 6.93 ± 0.76 | 8.45 ± 1.81 | 3.95 ± 0.02                        | 4.06 ± 0.29 | 8.07 ± 0.08 |
|                                 | AMP/SUL       | 8.00 ± 0.05                                       | 7.77 ± 0.06 | 7.44 ± 0.14 | 6.29 ± 0.04                        | 6.90 ± 0.16 | 8.43 ± 0.36 |
|                                 | MIN           | 8.04 ± 0.10                                       | 7.85 ± 0.60 | 7.89 ± 0.07 | 7.23 ± 0.06                        | 7.60 ± 0.27 | 7.88 ± 0.98 |
|                                 | MER           | 7.95 ± 0.07                                       | 7.56 ± 0.10 | 7.14 ± 0.16 | 6.49 ± 0.08                        | 5.92 ± 0.07 | 6.38 ± 0.05 |
|                                 | RIF           | 6.77 ± 0.15                                       | 6.13 ± 0.07 | 6.20 ± 0.43 | 5.24 ± 0.25                        | 4.80 ± 1.35 | 8.25 ± 0.41 |
|                                 | PMB + AMP/SUL | 5.75 ± 0.06                                       | 4.66 ± 0.69 | 6.53 ± 3.47 | 4.05 ± 0.09                        | 2.70 ± 0.12 | 1.31 ± 1.13 |
|                                 | PMB + MIN     | 5.84 ± 0.43                                       | 4.37 ± 0.39 | 6.28 ± 3.02 | 4.21 ± 0.04                        | 4.14 ± 0.21 | 6.93 ± 2.33 |
|                                 | PMB + MER     | 6.03 ± 0.54                                       | 3.99 ± 0.66 | 5.74 ± 2.81 | 4.41 ± 0.06                        | 2.60 ± 0.00 | 0.00 ± 0.00 |
|                                 | PMB + RIF     | 6.36 ± 0.28                                       | 3.87 ± 0.83 | 3.46 ± 0.34 | 0.00 ± 0.00                        | 0.00 ± 0.00 | 5.11 ± 3.83 |
| AR-279                          | PMB           | 8.50 ± 0.07                                       | 8.88 ± 0.15 | 8.65 ± 0.01 | 5.46 ± 0.02                        | 5.45 ± 0.64 | 7.97 ± 0.13 |
|                                 | AMP/SUL       | 8.22 ± 0.00                                       | 8.05 ± 0.00 | 7.97 ± 0.00 | 6.38 ± 0.05                        | 7.11 ± 0.05 | 8.16 ± 0.08 |
|                                 | MIN           | 8.03 ± 0.01                                       | 7.93 ± 0.00 | 7.80 ± 0.00 | 7.48 ± 0.02                        | 7.98 ± 0.01 | 8.07 ± 0.08 |
|                                 | MER           | 8.21 ± 0.00                                       | 7.89 ± 0.01 | 7.76 ± 0.01 | 5.74 ± 0.13                        | 6.36 ± 0.01 | 8.27 ± 0.05 |
|                                 | RIF           | 7.64 ± 0.21                                       | 7.65 ± 0.10 | 7.36 ± 0.04 | 6.11 ± 0.05                        | 5.79 ± 0.20 | 8.72 ± 0.28 |
|                                 | PMB + AMP/SUL | 8.10 ± 0.02                                       | 8.01 ± 0.01 | 7.95 ± 0.01 | 5.46 ± 0.02                        | 4.37 ± 0.01 | 4.29 ± 0.43 |
|                                 | PMB + MIN     | 8.06 ± 0.01                                       | 8.47 ± 0.39 | 7.63 ± 3.02 | 5.34 ± 0.17                        | 4.60 ± 0.00 | 7.32 ± 0.29 |
|                                 | PMB + MER     | 8.06 ± 0.02                                       | 7.80 ± 0.02 | 7.70 ± 0.01 | 5.45 ± 0.23                        | 4.27 ± 0.18 | 2.95 ± 0.64 |
|                                 | PMB + RIF     | 7.15 ± 0.08                                       | 7.10 ± 0.33 | 5.77 ± 0.32 | 4.19 ± 1.20                        | 1.70 ± 1.41 | 0.00 ± 0.00 |
| AR-285                          | PMB           | 8.00 ± 0.17                                       | 6.92 ± 0.35 | 8.01 ± 0.30 | 5.03 ± 0.01                        | 5.01 ± 0.09 | 7.31 ± 0.18 |
|                                 | AMP/SUL       | 8.00 ± 0.49                                       | 7.85 ± 0.20 | 7.34 ± 0.16 | 6.03 ± 0.05                        | 6.90 ± 0.05 | 7.75 ± 0.00 |
|                                 | MIN           | 8.20 ± 0.32                                       | 8.26 ± 0.17 | 8.30 ± 0.09 | 6.78 ± 0.02                        | 7.94 ± 0.02 | 7.88 ± 0.23 |
|                                 | MER           | 6.77 ± 0.17                                       | 6.52 ± 0.06 | 7.18 ± 0.81 | 6.08 ± 0.03                        | 5.46 ± 0.20 | 7.90 ± 0.02 |
|                                 | RIF           | 7.03 ± 0.25                                       | 7.00 ± 0.47 | 7.27 ± 1.16 | 6.93 ± 0.04                        | 7.15 ± 0.55 | 8.19 ± 0.21 |
|                                 | PMB + AMP/SUL | 8.05 ± 0.34                                       | 7.23 ± 0.18 | 7.88 ± 0.65 | 4.91 ± 0.08                        | 2.46 ± 0.02 | 0.00 ± 0.00 |
|                                 | PMB + MIN     | 8.22 ± 0.18                                       | 8.12 ± 0.28 | 8.25 ± 0.45 | 4.75 ± 0.05                        | 2.49 ± 0.02 | 7.19 ± 0.96 |
|                                 | PMB + MER     | 7.85 ± 0.06                                       | 7.24 ± 0.09 | 5.96 ± 1.07 | 4.83 ± 0.12                        | 1.85 ± 0.28 | 0.00 ± 0.00 |
|                                 | PMB + RIF     | 6.40 ± 0.21                                       | 6.46 ± 0.23 | 5.19 ± 0.21 | 3.83 ± 0.71                        | 1.85 ± 1.52 | 6.60 ± 1.10 |
| AR-313                          | PMB           | 7.53 ± 0.03                                       | 8.03 ± 0.01 | 8.02 ± 0.17 | 5.36 ± 0.05                        | 5.03 ± 0.03 | 7.31 ± 0.98 |
|                                 | AMP/SUL       | 7.99 ± 0.20                                       | 8.00 ± 0.13 | 7.74 ± 0.09 | 6.38 ± 0.08                        | 7.04 ± 0.30 | 8.20 ± 0.12 |
|                                 | MIN           | 7.86 ± 0.25                                       | 8.11 ± 0.16 | 7.55 ± 0.24 | 6.05 ± 0.02                        | 5.32 ± 0.08 | 7.77 ± 0.14 |
|                                 | MER           | 7.63 ± 0.00                                       | 7.46 ± 0.11 | 6.87 ± 0.08 | 6.51 ± 0.04                        | 7.85 ± 0.01 | 8.57 ± 0.08 |
|                                 | RIF           | 7.18 ± 0.10                                       | 7.02 ± 0.03 | 5.86 ± 0.73 | 5.64 ± 0.08                        | 6.26 ± 0.82 | 8.89 ± 0.14 |
|                                 | PMB + AMP/SUL | 7.70 ± 0.04                                       | 7.30 ± 0.12 | 7.73 ± 0.76 | 5.00 ± 0.27                        | 4.16 ± 0.54 | 1.31 ± 1.33 |
|                                 | PMB + MIN     | 7.29 ± 0.18                                       | 7.13 ± 0.11 | 6.51 ± 0.51 | 5.20 ± 0.08                        | 4.27 ± 0.06 | 3.85 ± 2.94 |
|                                 | PMB + MER     | 7.23 ± 0.14                                       | 7.07 ± 0.20 | 5.87 ± 0.42 | 5.32 ± 0.03                        | 4.01 ± 0.07 | 6.39 ± 3.11 |
|                                 | PMB + RIF     | 7.07 ± 0.03                                       | 6.14 ± 0.27 | 4.08 ± 0.23 | 4.16 ± 0.16                        | 0.00 ± 0.00 | 0.00 ± 0.00 |

PMB, polymyxin B; AMP/SUL, ampicillin/sulbactam; MIN, minocycline; MER, meropenem; RIF, rifampin

<sup>a</sup> Monotherapies and combinations were performed at 4x MIC against biofilms at a starting inoculum of  $\sim 10^8$  CFU/mL

<sup>b</sup> Monotherapies and combinations were performed at 0.5x MIC against planktonic cells at a starting inoculum of  $\sim 10^6$  CFU/mL
